# Supplementary material for: Epidemiology of Treponema pallidum, Chlamydia trachomatis, Neisseria gonorrhoeae, Trichomonas vaginalis, and herpes simplex virus type 2 among female sex workers in the Middle East and North Africa: systematic review and meta-analytics
Source: PubMed Central journal article supplement (PMC6642815; doi:10.7189/jogh.09.020408), 2019-12
Supplement: jogh-09-020408-s001.pdf [file jogh-09-020408-s001.pdf]

**J Glob Health 2019; 9: 020408**

**Online Supplementary Document**

**Table S1.** Preferred Reporting Items for Systematic Reviews and Meta-analyses (PRISMA) checklist [1]

| Section/topic                      | #  | Checklist item                                                                                                                                                                                                                                                                                              | Reported in main text          |
|------------------------------------|----|-------------------------------------------------------------------------------------------------------------------------------------------------------------------------------------------------------------------------------------------------------------------------------------------------------------|--------------------------------|
| Title                              | 1  | Identify the report as a systematic review, meta-analysis, or both.                                                                                                                                                                                                                                         | p. 1                           |
| Structured summary                 | 2  | Provide a structured summary including, as applicable: background; objectives; data sources; study eligibility criteria, participants, and interventions; study appraisal and synthesis methods; results; limitations; conclusions and implications of key findings; systematic review registration number. | p. 2-3                         |
| Rationale                          | 3  | Describe the rationale for the review in the context of what is already known.                                                                                                                                                                                                                              | p. 4-5                         |
| Objectives                         | 4  | Provide an explicit statement of questions being addressed with reference to participants, interventions, comparisons, outcomes, and study design (PICOS).                                                                                                                                                  | p. 5                           |
| Protocol and registration          | 5  | Indicate if a review protocol exists, if and where it can be accessed (e.g., Web address), and, if available, provide registration information including registration number.                                                                                                                               | NA                             |
| Eligibility criteria               | 6  | Specify study characteristics (e.g., PICOS, length of follow-up) and report characteristics (e.g., years considered, language, publication status) used as criteria for eligibility, giving rationale.                                                                                                      | p. 6-7                         |
| Information sources                | 7  | Describe all information sources (e.g., databases with dates of coverage, contact with study authors to identify additional studies) in the search and date last searched.                                                                                                                                  | p. 6                           |
| Search                             | 8  | Present full electronic search strategy for at least one database, including any limits used, such that it could be repeated.                                                                                                                                                                               | Box S1 in the OSD              |
| Study selection                    | 9  | State the process for selecting studies (i.e., screening, eligibility, included in systematic review, and, if applicable, included in the meta-analysis).                                                                                                                                                   | p. 6-7                         |
| Data collection process            | 10 | Describe method of data extraction from reports (e.g., piloted forms, independently, in duplicate) and any processes for obtaining and confirming data from investigators.                                                                                                                                  | p. 7                           |
| Data items                         | 11 | List and define all variables for which data were sought (e.g., PICOS, funding sources) and any assumptions and simplifications made.                                                                                                                                                                       | p. 7 and Box S2 in the OSD     |
| Risk of bias in individual studies | 12 | Describe methods used for assessing risk of bias of individual studies (including specification of whether this was done at the study or outcome level), and how this information is to be used in any data synthesis.                                                                                      | p. 8 and Table S3 in the OSD   |
| Summary measures                   | 13 | State the principal summary measures (e.g., risk ratio, difference in means).                                                                                                                                                                                                                               | p. 8-9                         |
| Synthesis of results               | 14 | Describe the methods of handling data and combining results of studies, if done, including measures of consistency (e.g., $I^2$ ) for each meta-analysis.                                                                                                                                                   | p. 8-9                         |
| Risk of bias across studies        | 15 | Specify any assessment of risk of bias that may affect the cumulative evidence (e.g., publication bias, selective reporting within studies).                                                                                                                                                                | p. 8                           |
| Additional analyses                | 16 | Describe methods of additional analyses (e.g., sensitivity or subgroup analyses, meta-regression), if done, indicating which were pre-specified.                                                                                                                                                            | p.8- 9 and Table S4 in the OSD |
| Study selection                    | 17 | Give numbers of studies screened, assessed for eligibility, and included in the review, with reasons for exclusions at each stage, ideally with a flow diagram.                                                                                                                                             | p. 10 and Figure 1             |

| <b>Section/topic</b>          | <b>#</b> | <b>Checklist item</b>                                                                                                                                                                                        | <b>Reported in main text</b>         |
|-------------------------------|----------|--------------------------------------------------------------------------------------------------------------------------------------------------------------------------------------------------------------|--------------------------------------|
| Study characteristics         | 18       | For each study, present characteristics for which data were extracted (e.g., study size, PICOS, follow-up period) and provide the citations.                                                                 | p. 11 and Tables 1-3                 |
| Risk of bias within studies   | 19       | Present data on risk of bias of each study and, if available, any outcome-level assessment (see Item 12).                                                                                                    | p. 11- and Tables S5-S6 in the OSD   |
| Results of individual studies | 20       | For all outcomes considered (benefits or harms), present, for each study: (a) simple summary data for each intervention group and (b) effect estimates and confidence intervals, ideally with a forest plot. | p. 12 and Table 4                    |
| Synthesis of results          | 21       | Present results of each meta-analysis done, including confidence intervals and measures of consistency.                                                                                                      | p. 12 and Table 4                    |
| Risk of bias across studies   | 22       | Present results of any assessment of risk of bias across studies (see Item 15).                                                                                                                              | p. 11-12 and Tables S5-S6 in the OSD |
| Additional analysis           | 23       | Give results of additional analyses, if done (e.g., sensitivity or subgroup analyses, meta-regression [see Item 16]).                                                                                        | p. 12-13 and Table 5                 |
| <b>DISCUSSION</b>             |          |                                                                                                                                                                                                              |                                      |
| Summary of evidence           | 24       | Summarize the main findings including the strength of evidence for each main outcome; consider their relevance to key groups (e.g., health care providers, users, and policy makers).                        | p. 14-17                             |
| Limitations                   | 25       | Discuss limitations at study and outcome level (e.g., risk of bias), and at review level (e.g., incomplete retrieval of identified research, reporting bias).                                                | p. 17-18                             |
| Conclusions                   | 26       | Provide a general interpretation of the results in the context of other evidence, and implications for future research.                                                                                      | p. 18                                |
| Funding                       | 27       | Describe sources of funding for the systematic review and other support (e.g., supply of data); role of funders for the systematic review.                                                                   | p. 19                                |

NA, not applicable. P, page(s). OSD, Online Supplementary Document.

**Box S1.** Search criteria for the systematic review of *Treponema pallidum* (syphilis), *Chlamydia trachomatis*, *Neisseria gonorrhoeae*, *Trichomonas vaginalis*, and herpes simplex virus type 2 (HSV-2) among FSWs in the Middle East and North Africa (MENA)

**PubMed** (September 04, 2018)

***Sexually transmitted infections***  
 “Sexually transmitted diseases”[Mesh] OR “Reproductive tract infections”[Mesh] OR “Genital diseases, female”[Mesh] OR “Chlamydia trachomatis”[Mesh] OR “Chlamydia”[Mesh] OR “Pelvic inflammatory disease”[Mesh] OR Chlamydia trachomatis[Text] OR Chlamydia[Text] OR Trachomatis[Text] OR Pelvic inflammatory disease[Text] OR Chlamydial[Text] OR Chlamydial infection[Text] OR Chlamydia infection[Text] OR “Neisseria gonorrhoeae”[Mesh] OR “Gonorrhoea”[Mesh] OR Neisseria gonorrhoeae[Text] OR Gonorrhoeae[Text] OR Gonorrhoea[Text] OR Gonococcus[Text] OR Gonococci[Text] OR Gonococcal[Text] OR Gonococcal infection[Text] OR “Syphilis”[Mesh] OR “Treponema pallidum”[Mesh] OR Syphilis[Text] OR Treponema pallidum[Text] OR Great Pox[Text] OR “Simplexvirus”[Mesh] OR “Herpes Simplex”[Mesh] OR Simplex virus[Text] OR “Herpes Genitalis”[Mesh] OR HSV type-2[Text] OR HSV type 2[Text] OR HSV2[Text] OR HSV-2[Text] OR HSV[Text] OR Human herpes virus[Text] OR Herpes simplex virus type 2[Text] OR Herpes simplex virus type-2[Text] OR Herpes simplex virus 2[Text] OR Herpes simplex virus-2[Text] OR Herpes simplex type 2[Text] OR Herpes simplex type-2[Text] OR Herpes simplex 2[Text] OR Herpes simplex-2[Text] OR Herpesvirus type 2[Text] OR Herpesvirus type-2[Text] OR Herpesvirus 2[Text] OR Herpesvirus-2[Text] OR Herpes virus type 2[Text] OR Herpes virus type-2[Text] OR Herpes virus[Text] OR Herpes virus-2[Text] OR genital herpes[Text] OR Herpes genitalis[Text] OR Stomatitis herpetic[Text] OR Herpes labialis[Text] OR HSV type-1[Text] OR HSV type 1[Text] OR HSV1[Text] OR HSV-1[Text] OR HSV 1[Text] OR Herpes simplex virus type 1[Text] OR Herpes simplex virus type-1[Text] OR Herpes simplex virus 1[Text] OR Herpes simplex virus-1[Text] OR Herpes simplex type 1[Text] OR Herpes simplex type-1[Text] OR Herpes simplex 1[Text] OR Herpes simplex-1[Text] OR Herpesvirus type 1[Text] OR Herpesvirus type-1[Text] OR Herpesvirus 1[Text] OR Herpesvirus-1[Text] OR Herpes virus type 1[Text] OR Herpes virus type-1[Text] OR Herpes virus 1[Text] OR Herpes virus-1[Text] OR Sexually transmitted[Text] OR Venereal[Text] or STI[Text] or STD[Text] or genital[Text] or infection[Text] or infections[Text] or infected[Text]

***Sex work***  
 "Extramarital Relations"[Mesh] OR “Sex Work”[Mesh] OR "Sex/analysis"[Mesh] OR "Sex/statistics and numerical data"[Mesh] OR "Sexual partners"[Mesh] OR "Sex Trafficking/epidemiology"[Mesh] OR "Sex Trafficking/statistics and numerical data"[Mesh] OR Sex work\*[Text] OR Sexual work\*[Text] OR Sexwork\*[Text] OR Sex-work\*[Text] OR Sexual partner\*[Text] OR Sex partner\*[Text] OR Sexual contact\*[Text] OR FSW[Text] OR FSWs[Text] OR CSW[Text] OR CSWs[Text] OR SW[Text] OR SWs[Text] OR TSW[Text] OR TSWs[Text] OR TS[Text] OR Travailleuse\* sexe[Text] OR Travailleuse\* sex[Text] OR Bar girl\*[Text] OR Callgirl\*[Text] OR Call girl\*[Text] OR Escort\*[Text] OR Masseur\*[Text] OR Hostess\*[Text] OR ((Premarital[Text] OR Pre-marital[Text] OR Pre marital[Text] OR Extramarital[Text] OR Extra-marital[Text] OR Extra marital[Text] OR Illicit[Text] OR Illegal[Text]) AND (Sex[Text] OR Sexual[Text] OR Relation\*[Text])) OR Outside marriage[Text] OR Out of marriage[Text] OR “Illegal social behavior”[Text] OR “Illegal social behaviour”[Text] OR Adultery[Text] OR Prostitut\*[Text] OR Promiscu\*[Text] OR Female entertain\*[Text] OR Sex entertain\*[Text] OR Sexual\* entertain\*[Text] OR Entertainment work\*[Text] OR Sex industr\*[Text] OR Sex establishment\*[Text] OR Brothel\*[Text] OR Red light[Text] OR Red-light[Text] OR Red district\*[Text] OR Nightclub\*[Text] OR Pimp[Text] OR ((Intergenerational[Text] OR Cross-generation\*[Text] OR Cross-generational[Text] OR Recreational[Text] OR Commercial[Text] OR Transaction\*[Text] OR Casual[Text] OR Group[Text] OR Informal[Text] OR Street[Text] OR Migrant\*[Text] OR Survival[Text] OR Occupational[Text] OR Tourism[Text]) AND (Sex[Text] OR Sexual\*[Text])) OR Sex seeking[Text] OR Sex-seeking[Text] OR Solicit\*[Text] OR ((Provision\*[Text] OR Provider\*[Text] OR Provid\*[Text] OR Sell\*[Text] OR Sold[Text] OR Exchang\*[Text] OR Trad\*[Text] OR Favor\*[Text] OR Consum\*[Text] OR Commodi\*[Text] OR Paid[Text] OR Paying[Text] OR Pay[Text] OR Payer\*[Text] OR Buying[Text] OR Buy[Text] OR Buyer\*[Text] OR Charg\*[Text] OR Engag\*[Text] OR Service\*[Text] OR Money[Text] OR Cash[Text] OR Drug\*[Text] OR Goods[Text] OR Gift\*[Text]) AND (Sex[Text] OR Sexual\*[Text])) OR Hidden population\*[Text] OR Hard to reach population\*[Text] OR Hard-to-reach population\*[Text] OR Core group\*[Text] OR Core risk group\*[Text] OR Vulnerable women[Text] OR Vulnerable population\*[Text] OR Vulnerable female\*[Text] OR Most-at-risk population\*[Text] OR Most at risk population\*[Text] OR High risk population\*[Text] OR High-risk population\*[Text] OR Population\* at high risk[Text] OR Population\* at high-

risk[Text] OR ((Traffick\*[Text] OR Slave\*[Text] OR Coerc\*[Text] OR Abduct\*[Text] OR Exploit\*[Text] OR Abuse\*[Text] OR Violence[Text]) AND (Sex[Text] OR Sexual\*[Text]))

### **MENA**

"Middle East"[Mesh] OR "Islam"[Mesh] OR "Arabs"[Mesh] OR "Arab World"[Mesh] OR "Africa, Northern"[Mesh] OR "Sudan"[Mesh] OR "Somalia"[Mesh] OR "Djibouti"[Mesh] OR "Pakistan"[Mesh] OR "South Sudan"[Mesh] OR "Middle East"[Text] OR "Middle-East"[Text] OR "North Africa"[Text] OR "North-Africa"[Text] OR "EMRO"[Text] OR "Eastern Mediterranean"[Text] OR "Arab"[Text] OR "Arab World"[Text] OR "Islam"[Text] OR "Afghanistan"[Text] OR "Afghan"[Text] OR "Algeria"[Text] OR "Bahrain"[Text] OR "Djibouti"[Text] OR "Egypt"[Text] OR "Jordan"[Text] OR "Kuwait"[Text] OR "Lebanon"[Text] OR "Leban"[Text] OR "Libya"[Text] OR "Iran"[Text] OR "Iraq"[Text] OR "Morocco"[Text] OR "Moroccan"[Text] OR "Oman"[Text] OR "Pakistan"[Text] OR "Qatar"[Text] OR "Saudi"[Text] OR "Somalia"[Text] OR "Somal"[Text] OR "Sudan"[Text] OR "Syria"[Text] OR "Tunisia"[Text] OR "United Arab Emirates"[Text] OR "Emirat"[Text] OR "West Bank"[Text] OR "Ghaza"[Text] OR "Gaza"[Text] OR "Palestine"[Text] OR "Palestinian"[Text] OR "Yemen"[Text] OR "UAE"[Text] OR "KSA"[Text]

### **Women**

"Female/analysis"[Mesh] OR "Female/statistics and numerical data"[Mesh] OR "Women/epidemiology"[Mesh] OR "Women/statistics and numerical data"[Mesh] OR Women[Text] OR Girl\*[Text] OR Female\*[Text]

## **FINAL PUBMED SEARCH**

**“Sexually transmitted infections” AND “Sex work” AND “MENA” AND “Women”**

**Embase** (September 04, 2018)

### ***Sexually transmitted infections***

exp sexually transmitted disease/ or exp chlamydia/ or exp chlamydia trachomatis/ or exp pelvic inflammatory disease/ or exp genital tract infection/ or exp genital tract inflammation/ or chlamydia.mp. or chlamydia trachomatis.mp. or trachomatis.mp. or chlamydial.mp. or chlamydial infection.mp. or chlamydia infection.mp. or pelvic inflammatory disease.mp. or exp gonorrhea / or exp neisseria gonorrhoeae / or gonorrhea.mp. or neisseria gonorrhoeae.mp. or gonorrhoeae.mp. or gonococcus.mp. or gonococci.mp. or gonococcal.mp. or gonococcal infection.mp. or exp syphilis/ or exp treponema pallidum/ or syphilis.mp. or great pox.mp. or treponema pallidum.mp. or exp herpes simplex virus/ or exp herpes simplex/ or exp herpes simplex virus 1/ or exp simplexvirus/ or exp herpesvirus/ or exp herpesviridae/ or exp herpes simplex virus 2/ or (herpes simplex or herpes simplex virus or HSV type-1 or HSV type 1 or HSV1 or HSV-1 or HSV 1 or human herpes virus or herpes simplex virus type 1 or Herpes simplex virus type-1 or herpes simplex virus 1 or herpes simplex virus-1 or herpes simplex type 1 or herpes simplex type-1 or herpes simplex 1 or herpes simplex-1 or Herpesvirus type 1 or Herpesvirus type-1 or Herpesvirus 1 or Herpesvirus-1 or Herpes virus type 1 or Herpes virus type-1 or Herpes virus 1 or Herpes virus-1 or genital herpes or herpes genitalis or herpes labialis or herpetic stomatitis or HSV type-2 or HSV type 2 or HSV2 or HSV-2 or HSV 2 or herpes simplex virus type 2 or herpes simplex virus type-2 or herpes simplex virus 2 or herpes simplex virus-2 or herpes simplex type 2 or herpes simplex type-2 or herpes simplex 2 or herpes simplex-2 or herpesvirus type 2 or herpesvirus type-2 or herpesvirus 2 or herpesvirus-2 or herpes virus type 2 or herpes virus type-2 or herpes virus 2 or Herpes virus-2 or sexually transmitted or venereal or STI or STD or genital or infection or infections or infected).mp.

### ***Sex work***

exp prostitution/ or exp casual sex/ or exp transactional sex/ or exp group sex/ or exp sex tourism/ or exp sexual promiscuity/ or exp extramarital sex/ or exp premarital sex/ or exp sexual relation/ or exp sexual partners/ or ((exp sex trafficking/ or exp sexual exploitation/ or exp sexual coercion/) NOT Child) or (sex\* work\* or sexwork\* or sex-work\* or sex partner\* or sexual partner\* or sexual contact\* or premarital sex or premarital sexual or premarital relation\* or pre-marital sex or pre-marital sexual or pre-marital relation\* or pre marital sex or pre marital sexual or pre marital relation\* or extramarital sex or extramarital sexual or extramarital relation\* or extra-marital sex or extra-marital sexual or extra-marital relation\* or extra marital sex or extra marital sexual or extra marital relation\* or illicit sex or illicit sexual or illicit relation\* or illegal sex or illegal sexual or illegal relation\* or (out\* ADJ1 marriage) or illegal social behavior?r or adultery or prostitut\* or promiscu\* or FSW or FSWs or CSW or CSWs or SW or SWs or TSW or TSWs or TS or (women ADJ4 sex\*) or (Travailleuse\* ADJ1 sex\*) or bar girl\* or call girl\* or callgirl\* or escort\* or masseuse\* or hostess\* or female entertain\* or sex

entertain\* or sexual entertain\* or entertainment work\* or sex industr\* or sex establishment\* or brothel\* or red light or red-light or (red ADJ1 district\*) or nightclub\* or pimp or recreation\* sex\* or intergenerational sex\* or cross-generation sex\* or cross-generational sex\* or commercial sex\* or transactional sex\* or sex\* transaction\* or casual sex\* or informal sex\* or group sex\* or street sex\* or (migra\* ADJ4 sex\*) or (sex\* ADJ4 migra\*) or survival sex\* or occupational sex\* or sex\* tourism or sex seeking or sex-seeking or solicit\* or (consum\* ADJ4 sex\*) or (sex\* ADJ 4 consumer) or (sex\* ADJ4 consumers) or (sex\* ADJ4 provi\*) or (provi\* ADJ4 sex\*) or (sell\* ADJ4 sex\*) or (sex\* ADJ4 sell\*) or sold sex\* or (exchang\* ADJ4 sex\*) or (sex\* ADJ4 exchange) or (trading ADJ4 sex\*) or (trade\* ADJ4 sex\*) or sex\* trade or sex\* favor\* or (commodi\* ADJ4 sex\*) or (sex\* ADJ4 commodi\*) or (paid ADJ4 sex\*) or (pay\* ADJ4 sex\*) or (sex\* ADJ4 pay\*) or (buy\* ADJ4 sex\*) or (sex\* ADJ4 buy\*) or (charg\* ADJ4 sex\*) or (sex\* ADJ4 charg\*) or (engag\* ADJ4 sex\*) or (sex\* ADJ4 engage\*) or (sex\* ADJ4 service\*) or (service\* ADJ4 sex\*) or (money ADJ4 sex\*) or (sex\* ADJ4 money) or (cash ADJ4 sex\*) or (sex\* ADJ4 cash) or (sex\* ADJ4 drug\*) or (drug\* ADJ4 sex\*) or (sex\* ADJ4 goods) or (goods ADJ4 sex\*) or (sex\* ADJ4 gift\*) or (gift\* ADJ4 sex\*) or hidden population\* or hard to reach population\* or hard-to-reach population\* or (core ADJ1 group\*) or vulnerable women or vulnerable female\*).mp. or ((vulnerable population\* or most-at-risk population\* or most at risk population\* or high risk population\* or high-risk population\* or population\* at high risk or population\* at high-risk).mp. AND (sex\* or infection\* or STI or STIs or STD or STDs or human immunodeficiency virus or HIV\* or AIDS\* or acquired immune deficiency syndrome or acquired immunodeficiency syndrome).mp.) or ((sex trafficking or sexual trafficking or (traffick\* ADJ4 sex\*) or sex\* slave\* or sex\* coerc\* or sex\* abduct\* or sex\* exploit\* or sex\* abuse\* or sex\* violence) NOT Child).mp. or ((women ADJ4 traffick\*) or (girls ADJ4 traffick\*) or (female\* ADJ4 traffick\*) or (traffick\* ADJ4 women) or (traffick\* ADJ4 girls) or (traffick\* ADJ4 female\*)).mp.

**MENA**

exp Middle East/ or exp North Africa/ or exp Arab/ or exp Afghanistan/ or exp Djibouti/ or exp Pakistan/ or exp Somalia/ or exp Sudan/ or exp South Sudan/ or Middle East.mp. or North Africa.mp. or EMRO.mp. or Eastern Mediterranean.mp. or Arab.mp. or Arabs.mp. or Arab World.mp. or Islam.mp. or Afghanistan.mp. or Afghan\*.mp. or Algeria\*.mp. or Bahrain\*.mp. or Djibouti.mp. or Egypt\*.mp. or Jordan\*.mp. or Kuwait\*.mp. or Leban\*.mp. or Libya\*.mp. or Iran\*.mp. or Iraq\*.mp. or Morocco\*.mp. or Oman\*.mp. or Pakistan\*.mp. or Qatar\*.mp. or Saudi\*.mp. or Somal\*.mp. or Sudan\*.mp. or Syria\*.mp. or Tunisia\*.mp. or United Arab Emirates.mp. or Emirat\*.mp. or West Bank.mp. or Ghaza\*.mp. or Gaza\*.mp. or Palestin\*.mp. or Yemen\*.mp. or UAE.mp. or KSA.mp.

**Women**

exp female/ or (women or girl\* or female\*).mp.

**FINAL EMBASE SEARCH**

**“Sexually transmitted infections” AND “Sex work” AND “MENA” AND “Women”**

**Regional databases**

**Iran Scientific Information Database** (September 11, 2018)

Keyword search for: “chlamydia”, “gonorrhoea”, “gonorrhoeae”, “gonococc”, “trichomonas”, “trichomoniasis”, “syphilis”, “treponema”, “HSV”, “herpes”, “venereal”, “sexually transmitted”, “pelvic inflammatory disease”, “reproductive tract infection”, “urinary tract infection”

**Iraq Academic Scientific Journals database** (September 10, 2018)

Keyword search for: “chlamydia”, “gonorrhoea”, “gonorrhoeae”, “gonococc\*”, “trichomonas”, “trichomoniasis”, “syphilis”, “treponema\*”, “HSV”, “herpes”, “venereal”, “sexually transmitted”, “pelvic inflammatory disease”, “reproductive tract infection\*”, “urinary tract infection”

**MENA HIV/AIDS Epidemiology Synthesis Project database** (September 01, 2018)

Hand search of all documents in the database

**PakMediNet database** (September 12, 2018)

Keyword search for: “chlamydia”, “gonorrhoea”, “gonorrhoeae”, “gonococcal”, “gonococcus”, “gonococci”, “trichomonas”, “trichomoniasis”, “syphilis”, “treponema”, “HSV”, “herpes”, “venereal”, “sexually transmitted”, “pelvic inflammatory disease”, “reproductive tract infection”, “urinary tract infection”

**World Health Organization Global Health Observatory data repository** (September 16, 2018)

Search by category: “sexually transmitted infections”

**World Health Organization African Index Medicus database** (September 08, 2018)

Keyword search for: “Algeria”, “Algerie”, “Djibouti”, “Egypt”, “Egypte”, “Libya”, “Libie”, “Maroc”, “Morocco”, “Tunisia”, “Tunisie”, “Somalia”, “Somalie”, “Sudan”, and “Soudan”

**World Health Organization Index Medicus for the Eastern Mediterranean Region database** (September 20, 2018)

Keyword search for: “chlamydia”, “gonorrhea”, “gonorrhoeae”, “gonococcal”, “gonococcus”, “gonococci”, “trichomonas”, “trichomoniasis”, “syphilis”, “treponema”, “HSV”, “herpes”, “venereal”, “sexually transmitted”, “pelvic inflammatory disease”, “reproductive tract”, “urinary tract”

**Abstract archives of the International AIDS Society conferences** (July 28, 2018)

Keyword search using each MENA country name

FSWs, female sex workers.

**Box S2. List of extracted variables**

|                                                                                                            |
|------------------------------------------------------------------------------------------------------------|
| <b>Report characteristics</b>                                                                              |
| Author(s)                                                                                                  |
| Year of publication                                                                                        |
| Full citation                                                                                              |
| Publication type                                                                                           |
| Data source                                                                                                |
| <b>General study characteristics</b>                                                                       |
| Study population and its characteristics                                                                   |
| Year(s) of data collection                                                                                 |
| Country of origin                                                                                          |
| Country of survey                                                                                          |
| City                                                                                                       |
| Study site                                                                                                 |
| Study design                                                                                               |
| Sampling methodology                                                                                       |
| Eligibility criteria                                                                                       |
| Participation rate                                                                                         |
| <b>Sexually transmitted infection incidence</b>                                                            |
| Number followed-up                                                                                         |
| Follow-up time                                                                                             |
| Seroconversion risk                                                                                        |
| Incidence rate                                                                                             |
| Specimen type (endocervical, urine, vaginal, serum)                                                        |
| Diagnostic method (polymerase chain reaction, culture, enzyme-linked immunoassay, rapid plasma reagin....) |
| <b>Sexually transmitted infection prevalence</b>                                                           |
| Number tested                                                                                              |
| Number positive                                                                                            |
| Specimen type (endocervical, urine, vaginal, serum)                                                        |
| Diagnostic method (polymerase chain reaction, culture, enzyme-linked immunoassay, rapid plasma reagin....) |



**Table S2.** Definitions of types of infection and classification of results of diagnostic methods for *Treponema pallidum* (syphilis), *Chlamydia trachomatis*, *Neisseria gonorrhoeae*, *Trichomonas vaginalis*, and herpes simplex virus type 2 (HSV-2) in studies identified by the systematic review into current, recent, and ever infection.

| Infection                    | Current infection                                                                                                                                                      | Recent infection                                                                                                                           | Ever infection* (seropositivity using antibody testing)                                                                               |
|------------------------------|------------------------------------------------------------------------------------------------------------------------------------------------------------------------|--------------------------------------------------------------------------------------------------------------------------------------------|---------------------------------------------------------------------------------------------------------------------------------------|
| <b>Definition</b>            | A state in which a person is currently a carrier of a pathogen responsible for causing the infection                                                                   | A state in which a person has acquired the infection some time <i>recently</i> , but may or may not currently be a carrier of the pathogen | A state in which a person has acquired the infection some time in the past, but may or may not currently be a carrier of the pathogen |
| <b>STI</b>                   |                                                                                                                                                                        |                                                                                                                                            |                                                                                                                                       |
| <i>Treponema pallidum</i>    | Positive RPR test                                                                                                                                                      | Not applicable                                                                                                                             | Positive FTA-ABS test                                                                                                                 |
|                              | Positive VDRL test<br>Positive RPR test or positive VRDL test with positive results confirmed through either positive FTA-ABS, or positive RDT, or positive TPHA tests |                                                                                                                                            | Positive RDT test<br>Positive TPHA test                                                                                               |
| <i>Chlamydia trachomatis</i> | Positive culture<br>Positive NAAT test<br>Positive immunofluorescence test on genital specimen (antigen detection)                                                     | Positive IgM serology<br>Positive IgA serology<br>Higher titers indicative of recent infection                                             | Positive IgG serology                                                                                                                 |
| <i>Neisseria gonorrhoeae</i> | Positive culture<br>Positive NAAT test<br>Positive gram stain                                                                                                          | Not applicable                                                                                                                             | Positive IgG serology                                                                                                                 |
| <i>Trichomonas vaginalis</i> | Positive culture<br>Positive wet mount<br>Positive NAAT test                                                                                                           | Not applicable                                                                                                                             | Positive IgG serology                                                                                                                 |
| Herpes simplex virus type 2  | Not applicable                                                                                                                                                         | Positive IgM serology<br>Positive IgA serology<br>Higher titers indicative of recent infection                                             | Positive IgG serology                                                                                                                 |

\*Testing conducted for the total sample regardless of test results for current infection.

FTA-ABS, fluorescent treponemal antibody absorption test. IgG, immunoglobulin G. NAAT, nucleic acid amplification test. RDT, rapid diagnostic test. RPR, rapid plasma reagin. STI, sexually transmitted infection. TPHA, *Treponema pallidum* haemagglutination assay. VDRL, venereal disease research laboratory.

**Table S3.** Criteria for assessing the risk of bias (ROB) of *Treponema pallidum* (syphilis), *Chlamydia trachomatis*, *Neisseria gonorrhoeae*, *Trichomonas vaginalis*, and herpes simplex virus type 2 (HSV-2) prevalence studies among FSWs in the Middle East and North Africa (MENA), as identified by the systematic review

| <b>Quality domain</b>                                  | <b>ROB assessment</b> | <b>Criteria</b>                                                                                         |
|--------------------------------------------------------|-----------------------|---------------------------------------------------------------------------------------------------------|
| <b>1. Rigor of sampling methodology</b>                | Low ROB               | Studies using probability-based sampling                                                                |
|                                                        | High ROB              | Studies using non-probability sampling                                                                  |
|                                                        | Unclear               | Information not reported                                                                                |
| <b>2. Response rate</b>                                | Low ROB               | ≥60% or ≥60% of target sample size reached in studies using respondent-driven or time-location sampling |
|                                                        | High ROB              | <60% or <60% of target sample size reached in studies using respondent-driven or time-location sampling |
|                                                        | Unclear               | Information not reported                                                                                |
| <b>3. Sexually transmitted infection ascertainment</b> | Low ROB               | Biological assay for infection ascertainment explicitly indicated                                       |
|                                                        | High ROB              | --                                                                                                      |
|                                                        | Unclear               | Biological assay for infection ascertainment not explicitly indicated                                   |

FSWs, female sex workers.

**Table S4.** Details of independent variables included in the meta-regression analyses for syphilis prevalence

| <b>Variable</b>                | <b>Sub-categories</b>                                                                                                                                                                                                                                             |
|--------------------------------|-------------------------------------------------------------------------------------------------------------------------------------------------------------------------------------------------------------------------------------------------------------------|
| <b>Country/subregion*</b>      | <ol style="list-style-type: none"> <li>1. Eastern MENA: Afghanistan, Iran, and Pakistan</li> <li>2. Egypt, Jordan, Yemen</li> <li>3. North Africa: Algeria, Morocco, Sudan, and Tunisia</li> <li>4. Horn of Africa: Djibouti, Somalia, and South Sudan</li> </ol> |
| <b>Year of data collection</b> | Median                                                                                                                                                                                                                                                            |
| <b>Infection type</b>          | <ol style="list-style-type: none"> <li>1. Current</li> <li>2. Ever (seropositivity using antibody testing)</li> <li>3. Unclear</li> </ol>                                                                                                                         |
| <b>Diagnostic method</b>       | <ol style="list-style-type: none"> <li>1. RPR/VDRL &amp; TPHA/FTA-ABS/RDT</li> <li>2. RPR/VDRL</li> <li>3. TPHA</li> <li>4. RDT</li> <li>5. Not specified</li> </ol>                                                                                              |
| <b>STI ascertainment</b>       | <ol style="list-style-type: none"> <li>1. Biological assay not explicitly reported</li> <li>2. Biological assay explicitly indicated</li> </ol>                                                                                                                   |
| <b>Sampling methodology</b>    | <ol style="list-style-type: none"> <li>1. Non-probability/unclear sampling</li> <li>2. Probability-based sampling</li> </ol>                                                                                                                                      |
| <b>Sample size</b>             | <ol style="list-style-type: none"> <li>1. &lt;100 participants</li> <li>2. ≥100 participants</li> </ol>                                                                                                                                                           |
| <b>Sampling methodology</b>    | <ol style="list-style-type: none"> <li>1. Non-probability/unclear sampling</li> <li>2. Probability-based sampling such as respondent-driven sampling or systematic random sampling</li> </ol>                                                                     |
| <b>Response rate</b>           | <ol style="list-style-type: none"> <li>1. &lt;60%/unclear</li> <li>2. ≥60% or ≥60% of target sample size reached in studies using respondent-driven sampling or time-location sampling.</li> </ol>                                                                |

\*Countries were grouped based on geography and similarity in prevalence levels.

FTA-ABS, fluorescent treponemal antibody absorption test. MENA, Middle East and North Africa. RDT, rapid diagnostic test. RPR, rapid plasma reagin. STI, sexually transmitted infection. TPHA, *Treponema pallidum* haemagglutination assay. VDRL, venereal disease research laboratory.

**Table S5.** Summary of the risk of bias (ROB) assessment for *Treponema pallidum* (syphilis), *Chlamydia trachomatis*, *Neisseria gonorrhoea*, *Trichomonas vaginalis*, herpes simplex virus type 2 (HSV-2) prevalence studies among FSWs in the Middle East and North Africa (MENA)

| <b>ROB quality domains</b>                          | <b>Number of studies</b> | <b>%</b>     |
|-----------------------------------------------------|--------------------------|--------------|
| <b>Rigor of sampling methodology</b>                |                          |              |
| Low ROB                                             | 63                       | 44.7         |
| High ROB                                            | 65                       | 46.1         |
| Unclear                                             | 13                       | 9.2          |
| <b>Response rate</b>                                |                          |              |
| Low ROB                                             | 65                       | 46.1         |
| High ROB                                            | 3                        | 2.1          |
| Unclear                                             | 73                       | 51.8         |
| <b>Sexually transmitted infection ascertainment</b> |                          |              |
| Low ROB                                             | 111                      | 78.7         |
| High ROB                                            | --                       | --           |
| Unclear                                             | 30                       | 21.3         |
| <b>Total number of studies</b>                      | <b>141*</b>              | <b>100.0</b> |
| <b>Summary</b>                                      |                          |              |
| <b>Low ROB</b>                                      |                          |              |
| At least 1 domain                                   | 120                      | 85.1         |
| At least 2 domains                                  | 80                       | 56.7         |
| All 3 domains                                       | 39                       | 27.7         |
| <b>High ROB</b>                                     |                          |              |
| At least 1 domain                                   | 68                       | 48.2         |
| At least 2 domains                                  | 0                        | 0            |
| All 3 domains                                       | 0                        | 0            |

\*Three studies reported in the systematic review were excluded from further analyses, either because of the priority order followed for selecting studies applying the same assay to different biological specimens (2 studies), or because measures based on culture were superseded by measures based on polymerase chain reaction (1 study).

FSWs, female sex workers. NA, not applicable.

**Table S6.** Risk of bias (ROB) assessment for syphilis, *Chlamydia trachomatis*, *Neisseria gonorrhoea*, *Trichomonas vaginalis*, herpes simplex virus type 2 (HSV-2) prevalence studies among FSWs in the Middle East and North Africa (MENA)

| Country<br>Short citation*                 | Year(s)<br>of data<br>collection | Tested<br>(n) | Prevalence | Sampling<br>method | Response<br>rate | STI<br>ascertainment |
|--------------------------------------------|----------------------------------|---------------|------------|--------------------|------------------|----------------------|
| <b>SYPHILIS CURRENT INFECTION</b>          |                                  |               |            |                    |                  |                      |
| <b>Afghanistan</b>                         |                                  |               |            |                    |                  |                      |
| Todd, 2010 [2]                             | 2006-08                          | 520           | 0          | High ROB           | Unclear          | Low ROB              |
| <b>Egypt</b>                               |                                  |               |            |                    |                  |                      |
| MOH, 2000 [3]                              | 1999-00                          | 52            | 5.8        | High ROB           | Unclear          | Low ROB              |
| <b>Iran</b>                                |                                  |               |            |                    |                  |                      |
| Kassaian, 2012 [4]                         | 2009-10                          | 91            | 0          | High ROB           | Low ROB          | Low ROB              |
| Navadeh, 2012 [5]                          | 2010                             | 139           | 7.2        | Low ROB            | Low ROB          | Low ROB              |
| Kazerooni, 2014 [6]                        | 2010-11                          | 278           | 0          | Low ROB            | Low ROB          | Low ROB              |
| Jahanbakhsh, 2017 [7]                      | 2012                             | 14            | 0          | High ROB           | Unclear          | Low ROB              |
| <b>Morocco</b>                             |                                  |               |            |                    |                  |                      |
| MOH, 2008 [8]                              | 2007                             | 141           | 13.5       | High ROB           | Low ROB          | Low ROB              |
| MOH, 2012 [9]                              | 2011-12                          | 362           | 21.4       | Low ROB            | Low ROB          | Low ROB              |
| MOH, 2012 [9]                              | 2011-12                          | 359           | 18.8       | Low ROB            | Low ROB          | Low ROB              |
| MOH, 2012 [9]                              | 2011-12                          | 392           | 13.9       | Low ROB            | Low ROB          | Low ROB              |
| MOH, 2012 [9]                              | 2011-12                          | 318           | 13.3       | Low ROB            | Low ROB          | Low ROB              |
| <b>Pakistan</b>                            |                                  |               |            |                    |                  |                      |
| Baqi, 1998 [10]                            | 1993-94                          | 81*           | 5.0        | High ROB           | Low ROB          | Low ROB              |
| Rehan, 2009 [11] & NACP, 2005 [12]         | 2004                             | 421           | 3.6        | High ROB           | Low ROB          | Low ROB              |
| Rehan, 2009 [11] & NACP, 2005 [12]         | 2004                             | 387           | 16.0       | Low ROB            | Low ROB          | Low ROB              |
| Shah, 2004 [13]                            | 2004                             | 157           | 11.5       | High ROB           | Unclear          | Low ROB              |
| Hawkes, 2009 [14]                          | 2007                             | 107           | 2.8        | Low ROB            | Unclear          | Low ROB              |
| Hawkes, 2009 [14]                          | 2007                             | 426           | 1.2        | Low ROB            | Unclear          | Low ROB              |
| Khan, 2011 [15]                            | 2007                             | 730           | 4.5        | Low ROB            | Low ROB          | Low ROB              |
| <b>Somalia</b>                             |                                  |               |            |                    |                  |                      |
| Jama, 1987 [16]                            | 1985-86                          | 85            | 44.7       | High ROB           | Unclear          | Low ROB              |
| Jama Ahmed, 1991 [17]                      | 1988-89                          | 155           | 47.7       | High ROB           | Unclear          | Low ROB              |
| Scott, 1991 [18]                           | 1989                             | 57            | 50.8       | High ROB           | Unclear          | Low ROB              |
| Corwin, 1991 [19]                          | 1990                             | 302           | 35.4       | High ROB           | Unclear          | Low ROB              |
| Watts, 1994 [20]                           | 1990                             | 236           | 30.9       | High ROB           | Unclear          | Low ROB              |
| IOM, 2017 [21]                             | 2014                             | 96            | 2.4        | Low ROB            | High ROB         | Low ROB              |
| <b>Sudan</b>                               |                                  |               |            |                    |                  |                      |
| MOH, 2016 [22]                             | 2015-16                          | 832           | 7.3        | Low ROB            | Low ROB          | Low ROB              |
| <b>Tunisia</b>                             |                                  |               |            |                    |                  |                      |
| Bchir, 1988 [23]                           | 1987                             | 42            | 28.6       | High ROB           | Unclear          | Low ROB              |
| Ayachi, 1997 [24]                          | 1992-94                          | 79            | 24.1       | High ROB           | Unclear          | Low ROB              |
| <b>Yemen</b>                               |                                  |               |            |                    |                  |                      |
| Stulhofer, 2008 [25]                       | 2008                             | 244           | 4.9        | Low ROB            | Unclear          | Low ROB              |
| <b>SYPHILIS EVER INFECTION<sup>†</sup></b> |                                  |               |            |                    |                  |                      |
| <b>Afghanistan</b>                         |                                  |               |            |                    |                  |                      |
| NACP, 2010 [26]                            | 2009                             | 368           | 5.4        | Low ROB            | Low ROB          | Low ROB              |
| NACP, 2012 [27]                            | 2012                             | 344           | 0.9        | Low ROB            | Low ROB          | Low ROB              |
| NACP, 2012 [27]                            | 2012                             | 333           | 0.0        | Low ROB            | Low ROB          | Low ROB              |
| NACP, 2012 [27]                            | 2012                             | 355           | 2.0        | Low ROB            | Low ROB          | Low ROB              |
| <b>Algeria</b>                             |                                  |               |            |                    |                  |                      |
| MOH, 2009 [28]                             | 2004                             | 185           | 11.9       | High ROB           | Unclear          | Low ROB              |
| MOH, 2009 [28]                             | 2007                             | 380           | 18.4       | High ROB           | Unclear          | Low ROB              |
| <b>Iran</b>                                |                                  |               |            |                    |                  |                      |
| Mirzazadeh, 2016 [29]                      | 2015                             | 1,337         | 0.4        | High ROB           | Unclear          | Low ROB              |
| <b>Pakistan</b>                            |                                  |               |            |                    |                  |                      |
| Hawkes, 2009 [14]                          | 2007                             | 107           | 2.8        | Low ROB            | Unclear          | Low ROB              |
| Hawkes, 2009 [14]                          | 2007                             | 426           | 1.6        | Low ROB            | Unclear          | Low ROB              |
| Bibi, 2010 [30]                            | 2003                             | 50            | 44.0       | High ROB           | Unclear          | Low ROB              |
| Raza, 2015 [31]                            | 2014                             | NR            | 20.0       | High ROB           | Unclear          | Low ROB              |
| <b>Somalia</b>                             |                                  |               |            |                    |                  |                      |

|                                                |         |       |      |          |         |         |
|------------------------------------------------|---------|-------|------|----------|---------|---------|
| Jama, 1987 [16]                                | 1985-86 | 85    | 57.6 | High ROB | Unclear | Low ROB |
| Jama Ahmed, 1991 [17]                          | 1988-89 | 155   | 69.0 | High ROB | Unclear | Low ROB |
| Burans, 1990 [32]                              | NR      | 89    | 28.1 | High ROB | Low ROB | Low ROB |
| IOM, 2017 [21]                                 | 2008    | 237   | 3.4  | Low ROB  | Low ROB | Low ROB |
| <b>Sudan</b>                                   |         |       |      |          |         |         |
| Sudan NACP, 2012 [33]                          | 2011    | 305   | 1.5  | Low ROB  | Low ROB | Low ROB |
| Sudan NACP, 2012 [33]                          | 2011    | 279   | 3.4  | Low ROB  | Low ROB | Low ROB |
| Sudan NACP, 2012 [33]                          | 2011    | 282   | 3.4  | Low ROB  | Low ROB | Low ROB |
| Sudan NACP, 2012 [33]                          | 2011    | 296   | 5.4  | Low ROB  | Low ROB | Low ROB |
| Sudan NACP, 2012 [33]                          | 2011    | 288   | 4.3  | Low ROB  | Low ROB | Low ROB |
| Sudan NACP, 2012 [33]                          | 2011    | 287   | 1.7  | Low ROB  | Low ROB | Low ROB |
| Sudan NACP, 2012 [33]                          | 2011    | 303   | 5.2  | Low ROB  | Low ROB | Low ROB |
| Sudan NACP, 2012 [33]                          | 2011    | 296   | 4.1  | Low ROB  | Low ROB | Low ROB |
| Sudan NACP, 2012 [33]                          | 2011    | 293   | 8.9  | Low ROB  | Low ROB | Low ROB |
| Sudan NACP, 2012 [33]                          | 2011    | 291   | 1.9  | Low ROB  | Low ROB | Low ROB |
| Sudan NACP, 2012 [33]                          | 2011    | 303   | 5.3  | Low ROB  | Low ROB | Low ROB |
| Sudan NACP, 2012 [33]                          | 2011    | 299   | 1.8  | Low ROB  | Low ROB | Low ROB |
| Sudan NACP, 2012 [33]                          | 2011    | 284   | 1.8  | Low ROB  | Low ROB | Low ROB |
| Sudan NACP, 2012 [33]                          | 2011    | 288   | 4.2  | Low ROB  | Low ROB | Low ROB |
| MOH, 2016 [22]                                 | 2015-16 | 832   | 12.0 | Low ROB  | Low ROB | Low ROB |
| <b>Tunisia</b>                                 |         |       |      |          |         |         |
| Bchir, 1988 [23]                               | 1987    | 42    | 38.1 | High ROB | Unclear | Low ROB |
| Ayachi, 1997 [24]                              | 1992-94 | 79    | 36.7 | High ROB | Unclear | Low ROB |
| Znazen, 2010 [34]                              | 2007    | 183   | 2.7  | High ROB | Low ROB | Low ROB |
| <b>SYPHILIS UNCLEAR</b>                        |         |       |      |          |         |         |
| <b>Afghanistan</b>                             |         |       |      |          |         |         |
| WHO, 2018 [35]                                 | 2010    | NR    | 8.7  | Unclear  | Unclear | Unclear |
| MENA HIV ESP, 2013 [36]                        | 2012    | 440   | 5.7  | Unclear  | Unclear | Unclear |
| WHO, 2018 [35]                                 | 2017    | 2,457 | 1.3  | Unclear  | Unclear | Unclear |
| <b>Algeria</b>                                 |         |       |      |          |         |         |
| WHO, 2018 [35]                                 | 2013    | 27    | 7.4  | Unclear  | Unclear | Unclear |
| WHO, 2018 [35]                                 | 2014    | 24    | 29.2 | Unclear  | Unclear | Unclear |
| WHO, 2018 [35]                                 | 2016    | 183   | 14.2 | High ROB | Unclear | Unclear |
| WHO, 2018 [35]                                 | 2017    | 81    | 16.0 | High ROB | Unclear | Unclear |
| <b>Djibouti</b>                                |         |       |      |          |         |         |
| WHO, 2015 [37]                                 | 2014    | 361   | 5.0  | Unclear  | Unclear | Unclear |
| <b>Iran</b>                                    |         |       |      |          |         |         |
| WHO, 2018 [35]                                 | 2008    | NR    | 1.6  | Unclear  | Unclear | Unclear |
| Moayedi-Nia, 2016 [38]                         | 2012-13 | 161   | 0    | Low ROB  | Unclear | Unclear |
| <b>Jordan</b>                                  |         |       |      |          |         |         |
| WHO, 2015 [37]                                 | 2008    | NR    | 6.7  | Unclear  | Unclear | Unclear |
| <b>Morocco</b>                                 |         |       |      |          |         |         |
| Khattabi, 2005 [39]                            | 2004    | 332   | 9.6  | High ROB | Unclear | Unclear |
| Khattabi, 2005 [39]                            | 2004    | 272   | 12.1 | High ROB | Unclear | Unclear |
| Khattabi, 2005 [39]                            | 2004    | 143   | 9.0  | High ROB | Unclear | Unclear |
| Bennani, 2006 [40]                             | 2005    | 102   | 11.8 | High ROB | Unclear | Unclear |
| Bennani, 2006 [40]                             | 2005    | 143   | 13.3 | High ROB | Unclear | Unclear |
| WHO, 2018 [35]                                 | 2008    | NR    | 16.9 | Unclear  | Unclear | Unclear |
| <b>Pakistan</b>                                |         |       |      |          |         |         |
| MENA HIV ESP, 2010 [41]                        | 2007    | NR    | 23.5 | Unclear  | Unclear | Unclear |
| <b>Somalia</b>                                 |         |       |      |          |         |         |
| WHO, 2018 [35]                                 | 2017    | 860   | 2.7  | Low ROB  | Unclear | Unclear |
| <b>Sudan</b>                                   |         |       |      |          |         |         |
| WHO, 2018 [35]                                 | 2016    | 4,123 | 4.1  | Low ROB  | Unclear | Unclear |
| WHO, 2018 [35]                                 | 2017    | 1,244 | 14.4 | Unclear  | Unclear | Unclear |
| <b>Yemen</b>                                   |         |       |      |          |         |         |
| WHO, 2018 [35]                                 | 2010    | 301   | 0    | Low ROB  | Unclear | Unclear |
| <b>CHLAMYDIA TRACHOMATIS CURRENT INFECTION</b> |         |       |      |          |         |         |
| <b>Algeria</b>                                 |         |       |      |          |         |         |
| Kadi, 1989 [42]                                | NR      | 44    | 45.5 | High ROB | Unclear | Low ROB |
| <b>Egypt</b>                                   |         |       |      |          |         |         |
| MOH, 2000 [3]                                  | 1999-00 | 52    | 7.7  | High ROB | Unclear | Low ROB |

|                                                         |         |       |                        |          |          |         |  |
|---------------------------------------------------------|---------|-------|------------------------|----------|----------|---------|--|
| <b>Iran</b>                                             |         |       |                        |          |          |         |  |
| Darougar, 1983 [43]                                     | NR      | 116   | 6.9                    | High ROB | Unclear  | Low ROB |  |
| Kazerooni, 2014 [6]                                     | 2010-11 | 278   | 9.0                    | Low ROB  | Low ROB  | Low ROB |  |
| Mirzazadeh, 2016 [29]                                   | 2015    | 1,337 | 6.0                    | High ROB | Unclear  | Low ROB |  |
| <b>Morocco</b>                                          |         |       |                        |          |          |         |  |
| MOH, 2008 [8]                                           | 2007    | 141   | 22.7                   | High ROB | Low ROB  | Low ROB |  |
| MOH, 2012 [9]                                           | 2011-12 | 368   | 22.4                   | Low ROB  | Low ROB  | Low ROB |  |
| <b>Pakistan</b>                                         |         |       |                        |          |          |         |  |
| Rehan, 2009 [11]                                        | 2004    | 348   | 5.2                    | High ROB | Low ROB  | Low ROB |  |
| Rehan, 2009 [11]                                        | 2004    | 383   | 11.0                   | Low ROB  | Low ROB  | Low ROB |  |
| Hawkes, 2009 [14]                                       | 2007    | 107   | 0.9                    | Low ROB  | Unclear  | Low ROB |  |
| Hawkes, 2009 [14]                                       | 2007    | 426   | 1.7                    | Low ROB  | Unclear  | Low ROB |  |
| Khan, 2011 [15]                                         | 2007    | 730   | 7.7                    | Low ROB  | Low ROB  | Low ROB |  |
| <b>Somalia</b>                                          |         |       |                        |          |          |         |  |
| IOM, 2017 [21]                                          | 2014    | 90    | 0.7                    | Low ROB  | High ROB | Low ROB |  |
| <b>Tunisia</b>                                          |         |       |                        |          |          |         |  |
| Znazen, 2010 [34]                                       | 2007    | 188   | 72.9                   | Low ROB  | High ROB | Low ROB |  |
| <b>CHLAMYDIA TRACHOMATIS RECENT INFECTION</b>           |         |       |                        |          |          |         |  |
| <b>Algeria</b>                                          |         |       |                        |          |          |         |  |
| Kadi, 1989 [42]                                         | NR      | 44    | 95.0                   | High ROB | Unclear  | Low ROB |  |
| <b>Iran</b>                                             |         |       |                        |          |          |         |  |
| Darougar, 1983 [43]                                     | NR      | 154   | 29.2                   | High ROB | Unclear  | Low ROB |  |
| <b>CHLAMYDIA TRACHOMATIS EVER INFECTION<sup>†</sup></b> |         |       |                        |          |          |         |  |
| <b>Algeria</b>                                          |         |       |                        |          |          |         |  |
| Kadi, 1989 [42]                                         | NR      | 44    | 100                    | High ROB | Unclear  | Low ROB |  |
| <b>Iran</b>                                             |         |       |                        |          |          |         |  |
| Darougar, 1983 [43]                                     | NR      | 154   | 94.2                   | High ROB | Unclear  | Low ROB |  |
| Kassaian, 2012 [4]                                      | 2009-10 | 91    | 19.8                   | High ROB | Low ROB  | Low ROB |  |
| <b>Tunisia</b>                                          |         |       |                        |          |          |         |  |
| Bchir, 1988 [23]                                        | 1987    | 42    | 73.8                   | High ROB | Unclear  | Low ROB |  |
| Znazen, 2010 [34]                                       | 2007    | 183   | 85.8                   | High ROB | Low ROB  | Low ROB |  |
| <b>CHLAMYDIA TRACHOMATIS UNCLEAR</b>                    |         |       |                        |          |          |         |  |
| <b>Iran</b>                                             |         |       |                        |          |          |         |  |
| Navadeh, 2012 [5] & WHO, 2011 [44]                      | 2010    | 144   | 2.9                    | Low ROB  | Low ROB  | Unclear |  |
| <b>Morocco</b>                                          |         |       |                        |          |          |         |  |
| MENA HIV ESP, 2010 [41]                                 | NR      | NR    | 19.1                   | Unclear  | Unclear  | Unclear |  |
| <b>NEISSERIA GONORRHOEAE CURRENT INFECTION</b>          |         |       |                        |          |          |         |  |
| <b>Egypt</b>                                            |         |       |                        |          |          |         |  |
| MOH, 2000 [3]                                           | 1999-00 | 52    | 7.7                    | High ROB | Unclear  | Low ROB |  |
| <b>Iran</b>                                             |         |       |                        |          |          |         |  |
| Kazerooni, 2014 [6]                                     | 2010-11 | 278   | 1.4                    | Low ROB  | Low ROB  | Low ROB |  |
| Navadeh, 2012 [5] & WHO, 2011 [44]                      | 2010    | 144   | 0                      | Low ROB  | Low ROB  | Unclear |  |
| Nasirian, 2017 [45]                                     | 2013-14 | 99    | 9.1                    | High ROB | Low ROB  | Low ROB |  |
| Taghizadeh, 2015 [46]                                   | 2014    | 117   | 1.0                    | High ROB | Low ROB  | Unclear |  |
| Mirzazadeh, 2016 [29]                                   | 2015    | 1,337 | 1.3                    | High ROB | Unclear  | Low ROB |  |
| <b>Morocco</b>                                          |         |       |                        |          |          |         |  |
| MOH, 2008 [8]                                           | 2007    | 141   | 10.6                   | High ROB | Low ROB  | Low ROB |  |
| MENA HIV ESP, 2010 [41]                                 | NR      | NR    | 3.5                    | Unclear  | Unclear  | Unclear |  |
| MOH, 2012 [9]                                           | 2011-12 | 368   | 11.7                   | Low ROB  | Low ROB  | Low ROB |  |
| <b>Pakistan</b>                                         |         |       |                        |          |          |         |  |
| Rehan, 2009 [11]                                        | 2004    | 348   | 9.8                    | High ROB | Low ROB  | Low ROB |  |
| Rehan, 2009 [11]                                        | 2004    | 383   | 12.3                   | Low ROB  | Low ROB  | Low ROB |  |
| Hawkes, 2009 [14]                                       | 2007    | 107   | 1.9                    | Low ROB  | Unclear  | Low ROB |  |
| Hawkes, 2009 [14]                                       | 2007    | 426   | 2.0                    | Low ROB  | Unclear  | Low ROB |  |
| Khan, 2011 [15]                                         | 2007    | 730   | 7.5                    | Low ROB  | Low ROB  | Low ROB |  |
| <b>Somalia</b>                                          |         |       |                        |          |          |         |  |
| Burans, 1990 [32]                                       | NR      | 89    | 11.2                   | High ROB | Low ROB  | Low ROB |  |
| IOM, 2017 [21]                                          | 2014    | 91    | 0.4                    | Low ROB  | High ROB | Low ROB |  |
| <b>Tunisia</b>                                          |         |       |                        |          |          |         |  |
| NACP, 2005 [47]                                         | 2005    | NR    | 12.0-17.0 <sup>‡</sup> | High ROB | Unclear  | Unclear |  |
| Znazen, 2010 [34]                                       | 2007    | 188   | 11.2                   | High ROB | Low ROB  | Low ROB |  |

| <b>TRICHOMONAS VAGINALIS CURRENT INFECTION</b> |         |       |      |          |         |         |
|------------------------------------------------|---------|-------|------|----------|---------|---------|
| <b>Egypt</b>                                   |         |       |      |          |         |         |
| MOH, 2000 [3]                                  | 1999-00 | 52    | 19.2 | High ROB | Unclear | Low ROB |
| <b>Iran</b>                                    |         |       |      |          |         |         |
| Vafaei, 2015 [48]                              | 2009-11 | 85    | 8.2  | High ROB | Low ROB | Low ROB |
| Navadeh, 2012 [5] & WHO, 2011 [44]             | 2010    | 144   | 1.4  | Low ROB  | Low ROB | Unclear |
| Nasirian, 2017 [45]                            | 2013-14 | 99    | 0.0  | High ROB | Low ROB | Low ROB |
| Mirzazadeh, 2016 [29]                          | 2015    | 1,337 | 11.9 | High ROB | Unclear | Low ROB |
| <b>Morocco</b>                                 |         |       |      |          |         |         |
| MOH, 2008 [8]                                  | 2007    | 141   | 14.9 | High ROB | Low ROB | Low ROB |
| MOH, 2012 [9]                                  | 2011-12 | 367   | 11.8 | Low ROB  | Low ROB | Low ROB |
| <b>Pakistan</b>                                |         |       |      |          |         |         |
| Rehan, 2009 [11]                               | 2004    | 386   | 5.2  | High ROB | Low ROB | Low ROB |
| Rehan, 2009 [11]                               | 2004    | 384   | 19.3 | Low ROB  | Low ROB | Low ROB |
| Hawkes, 2009 [14]                              | 2007    | 107   | 5.7  | Low ROB  | Unclear | Low ROB |
| Hawkes, 2009 [14]                              | 2007    | 426   | 4.3  | Low ROB  | Unclear | Low ROB |
| Khan, 2011 [15]                                | 2007    | 730   | 5.1  | Low ROB  | Low ROB | Low ROB |
| <b>HSV-2 EVER INFECTION<sup>†</sup></b>        |         |       |      |          |         |         |
| <b>Pakistan</b>                                |         |       |      |          |         |         |
| Hawkes, 2009 [14]                              | 2007    | 107   | 4.7  | Low ROB  | Unclear | Low ROB |
| Hawkes, 2009 [14]                              | 2007    | 426   | 8.0  | Low ROB  | Unclear | Low ROB |
| <b>Syria</b>                                   |         |       |      |          |         |         |
| Ibrahim, 2000 [49]                             | 1995-98 | 101   | 22.8 | High ROB | Unclear | Low ROB |
| Ibrahim, 2000 [49]                             | 1995-98 | 125   | 20.0 | High ROB | Unclear | Low ROB |
| <b>Tunisia</b>                                 |         |       |      |          |         |         |
| Znazen, 2010 [34]                              | 2007    | 183   | 55.5 | High ROB | Low ROB | Low ROB |

The table is sorted, for each country, by data collection year(s) then city/province.

<sup>†</sup>Three studies reported in the systematic review were excluded from further analyses, either because of the priority order followed for selecting studies applying the same assay to different biological specimens (2 studies), or because measures based on culture were superseded by measures based on polymerase chain reaction (1 study).

<sup>‡</sup>Ever infection indicates seropositivity using antibody testing.

<sup>§</sup>Range reported based on several studies whose abstracts or full-texts could not be retrieved (mid-point: 14.5%).

IOM, International Organization for Migration. MENA HIV ESP, MENA HIV/AIDS Epidemiology Synthesis Project database. MOH, Ministry of Health. NACP, National AIDS Control Program. NR, not reported. STI, sexually transmitted infection. WHO, World Health Organization.



**Table S7.** Results of meta-analyses stratified by subregion on prevalence studies for current and ever infection with *Treponema pallidum* (syphilis) among FSWs in the Middle East and North Africa

| Sexually transmitted infection    | Studies        | Samples |          | Reported prevalence |            | Pooled mean prevalence |           | Heterogeneity measures   |                            |                                        |
|-----------------------------------|----------------|---------|----------|---------------------|------------|------------------------|-----------|--------------------------|----------------------------|----------------------------------------|
|                                   | N              | Tested  | Positive | Median* (%)         | Range* (%) | Estimate (%)           | 95% CI    | Q <sup>†</sup> (p-value) | I <sup>‡</sup> (%; 95% CI) | Prediction interval <sup>§</sup> (95%) |
| <b>Subregion</b>                  |                |         |          |                     |            |                        |           |                          |                            |                                        |
| <b>Current infection</b>          |                |         |          |                     |            |                        |           |                          |                            |                                        |
| Eastern MENA                      | 13             | 3,351   | 150      | 3.6                 | 0-16.0     | 3.0                    | 0.9-9.2   | 203.7 (p<0.0001)         | 94.1 (91.5-95.9)           | 0.0-20.9                               |
| Egypt, Jordan, and Yemen          | 2 <sup>‡</sup> | 296     | 15       | 5.4                 | 4.9-5.8    | --                     | --        | --                       | --                         | --                                     |
| North Africa                      | 7              | 1,693   | 293      | 18.8                | 13.3-28.6  | 17.6                   | 14.2-21.3 | 19.1 (p=0.004)           | 68.6 (30.7-85.8)           | 8.3-29.5                               |
| Horn of Africa                    | 12             | 1,763   | 384      | 32.9                | 2.4-62.0   | 27.8                   | 15.2-42.4 | 350.1 (p<0.0001)         | 96.9 (95.7-97.7)           | 0.0-84.4                               |
| <b>Ever infection<sup>¶</sup></b> |                |         |          |                     |            |                        |           |                          |                            |                                        |
| Eastern MENA                      | 9              | 3,604   | 125      | 2.0                 | 0-44.0     | 4.6                    | 1.3-9.7   | 250.5 (p<0.0001)         | 96.8 (95.4-97.8)           | 0.0-30.3                               |
| Egypt, Jordan, and Yemen          | 0              | --      | --       | --                  | --         | --                     | --        | --                       | --                         | --                                     |
| North Africa                      | 30             | 4,963   | 297      | 5.3                 | 0-38.1     | 7.7                    | 5.4-10.4  | 267.2 (p<0.0001)         | 89.1 (85.6-91.8)           | 0.0-25.0                               |
| Horn of Africa                    | 11             | 1,401   | 288      | 52.5                | 3.1-92.3   | 46.8                   | 26.6-67.4 | 388.5 (p<0.0001)         | 97.4 (96.5-98.1)           | 0.0-67.4                               |

The same population may have contributed different measures for both current infection and ever (seropositivity using antibody testing) infection.

\*Medians and ranges were calculated based on the stratified prevalence measures.

<sup>†</sup>Q: the Cochran's Q statistic is a measure assessing the existence of heterogeneity in effect size (here, prevalence) across studies.

<sup>‡</sup>I<sup>2</sup>: a measure assessing the magnitude of between-study variation that is due to differences in effect size (here, prevalence) across studies rather than chance.

<sup>§</sup>Prediction interval: a measure estimating the 95% interval of the distribution of true effect sizes (here, prevalence measures).

<sup>¶</sup>Meta-analyses were performed if at least three studies were available.

<sup>¶</sup>Ever infection indicates seropositivity using antibody testing.

CI, confidence interval. FSWs, female sex workers.

**Table S8.** Results of stratified meta-analyses by year of data collection on prevalence studies for current and ever infection with *Treponema pallidum* (syphilis) and current infection with *Chlamydia trachomatis*, *Neisseria gonorrhoeae*, and *Trichomonas vaginalis* among FSWs in the Middle East and North Africa

| Sexually transmitted infection              | Studies | Samples |          | Reported prevalence |            | Pooled mean prevalence |           | Heterogeneity measures   |                            |                                        |
|---------------------------------------------|---------|---------|----------|---------------------|------------|------------------------|-----------|--------------------------|----------------------------|----------------------------------------|
|                                             | N       | Tested  | Positive | Median* (%)         | Range* (%) | Estimate (%)           | 95% CI    | Q <sup>†</sup> (p-value) | I <sup>‡</sup> (%; 95% CI) | Prediction interval <sup>§</sup> (95%) |
| <b><i>Treponema pallidum</i> (syphilis)</b> |         |         |          |                     |            |                        |           |                          |                            |                                        |
| <b>Current infection</b>                    |         |         |          |                     |            |                        |           |                          |                            |                                        |
| <2010                                       | 25      | 4,313   | 526      | 11.5                | 0-62.0     | 15.0                   | 8.8-22.3  | 855.1 (p<0.0001)         | 97.2 (96.6-97.7)           | 0.0-60.0                               |
| ≥2010                                       | 9       | 2,790   | 316      | 7.3                 | 0-21.4     | 8.0                    | 3.4-14.1  | 187.3 (p<0.0001)         | 95.7 (93.6-97.1)           | 0.0-35.8                               |
| <b>Ever infection<sup>  </sup></b>          |         |         |          |                     |            |                        |           |                          |                            |                                        |
| <2010                                       | 30      | 2,386   | 382      | 29.2                | 0-92.3     | 24.6                   | 16.1-34.2 | 693.4 (p<0.0001)         | 95.8 (94.8-96.6)           | 0.0-80.2                               |
| ≥2010                                       | 20      | 7,582   | 328      | 3.4                 | 0-20.0     | 3.6                    | 2.0-5.6   | 342.2 (p<0.0001)         | 94.4 (92.6-95.8)           | 0.0-16.9                               |
| <b><i>Chlamydia trachomatis</i></b>         |         |         |          |                     |            |                        |           |                          |                            |                                        |
| <b>Current infection</b>                    |         |         |          |                     |            |                        |           |                          |                            |                                        |
| <2010                                       | 12      | 2,535   | 325      | 8.8                 | 0.9-76.2   | 17.1                   | 7.9-28.8  | 526.1 (p<0.0001)         | 97.9 (97.3-98.4)           | 0.0-69.9                               |
| ≥2010                                       | 4       | 2,073   | 187      | 7.5                 | 0.7-22.4   | 8.4                    | 2.4-17.3  | 80.6 (p<0.0001)          | 96.3 (93.1-98.0)           | 0.0-65.1                               |
| <b><i>Neisseria gonorrhoeae</i></b>         |         |         |          |                     |            |                        |           |                          |                            |                                        |
| <b>Current infection</b>                    |         |         |          |                     |            |                        |           |                          |                            |                                        |
| <2010                                       | 13      | 2,796   | 227      | 9.7                 | 1.9-17.5   | 8.1                    | 5.6-10.9  | 73.2 (p<0.0001)          | 83.6 (73.4-89.9)           | 0.9-20.6                               |
| ≥2010                                       | 7       | 2,434   | 74       | 1.3                 | 0-11.7     | 2.2                    | 0.2-5.8   | 88.0 (p<0.0001)          | 93.2 (88.4-96.0)           | 0.0-20.6                               |
| <b><i>Trichomonas vaginalis</i></b>         |         |         |          |                     |            |                        |           |                          |                            |                                        |
| <b>Current infection</b>                    |         |         |          |                     |            |                        |           |                          |                            |                                        |
| <2010                                       | 8       | 2,226   | 186      | 6.4                 | 1.2-19.3   | 8.2                    | 4.2-13.3  | 100.9 (p<0.0001)         | 93.1 (88.6-95.8)           | 0.0-30.6                               |
| ≥2010                                       | 5       | 2,032   | 211      | 8.2                 | 0-11.9     | 5.5                    | 1.6-11.2  | 56.8 (p<0.0001)          | 93.0 (86.5-96.3)           | 0.0-35.0                               |

The same population may have contributed different measures for both current infection and ever (seropositivity using antibody testing) infection.

\*Medians and ranges were calculated based on the stratified prevalence measures.

<sup>†</sup>Q: the Cochran's Q statistic is a measure assessing the existence of heterogeneity in effect size (here, prevalence) across studies.

<sup>‡</sup>I<sup>2</sup>: a measure assessing the magnitude of between-study variation that is due to differences in effect size (here, prevalence) across studies rather than chance.

<sup>§</sup>Prediction interval: a measure estimating the 95% interval of the distribution of true effect sizes (here, prevalence measures).

<sup>||</sup>Ever infection indicates seropositivity using antibody testing.

CI, confidence interval. FSWs, female sex workers.

**Figure S1.** Scatter plots showing the time trend for the prevalence of A) current and B) ever infection with *Treponema pallidum* (syphilis) among FSWs in the Middle East and North Africa

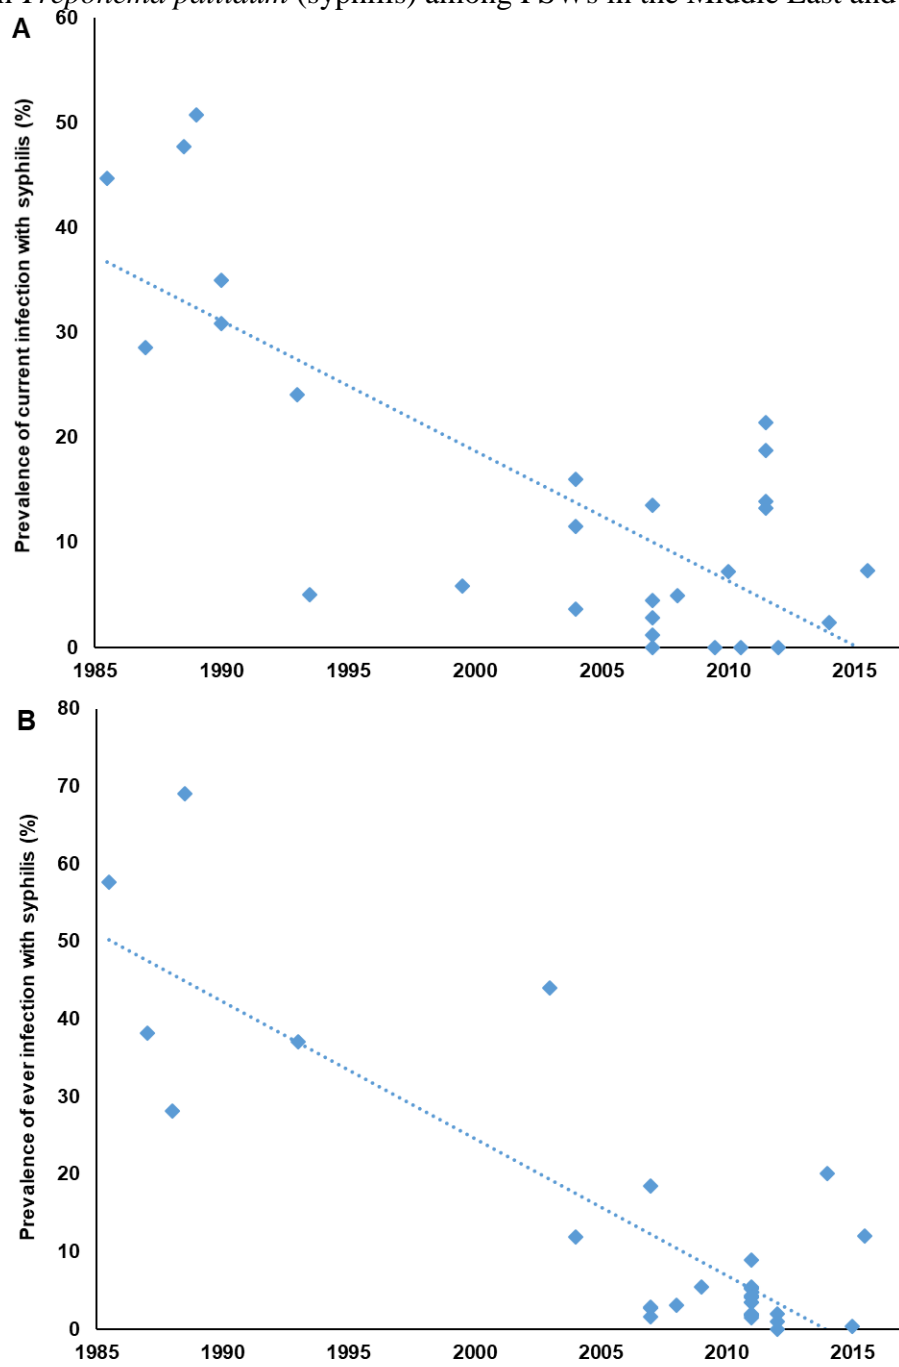

## References

- 1 Moher D, Liberati A, Tetzlaff J, Altman DG, Group P. Preferred reporting items for systematic reviews and meta-analyses: The PRISMA statement. *PLoS medicine*. 2009;6:e1000097.
- 2 Todd CS, Nasir A, Stanekzai MR, Bautista CT, Botros BA, Scott PT, et al. HIV, hepatitis B, and hepatitis C prevalence and associated risk behaviors among female sex workers in three Afghan cities. *Aids*. 2010;24 Suppl 2:S69-75.
- 3 Ministry of Health and Population, National AIDS Program. Evaluation of selected reproductive health infections in various Egyptian population groups in Greater Cairo. Cairo, Egypt: 2000.
- 4 Kassaian N, Ataei B, Yaran M, Babak A, Shoaei P, Ataie M. HIV and other sexually transmitted infections in women with illegal social behavior in Isfahan, Iran. *Adv Biomed Res*. 2012;1:5.
- 5 Navadeh S, Mirzazadeh A, Mousavi L, Haghdoost A, Fahimfar N, Sedaghat A. HIV, HSV2 and syphilis prevalence in female sex workers in Kerman, South-East Iran; using respondent-driven sampling. *Iran J Public Health*. 2012;41:60-5.
- 6 Kazerooni PA, Motazedian N, Motamedifar M, Sayadi M, Sabet M, Lari MA, et al. The prevalence of human immunodeficiency virus and sexually transmitted infections among female sex workers in Shiraz, south of Iran: By respondent-driven sampling. *International Journal of STD and AIDS*. 2014;25:155-61.
- 7 Jahanbakhsh F, Bagheri Amiri F, Sedaghat A, Fahimfar N, Mostafavi E. Prevalence of HAV Ab, HEV (IgG), HSV2 IgG, and syphilis among sheltered homeless adults in Tehran, 2012. *Int J Health Policy Manag*. 2017;7:225-30.
- 8 Royaume du Maroc-Ministere de la Sante. Etude de prevalence des IST chez les femmes qui consultent pour pertes vaginales et/ou douleurs du bas ventre. Rabat, Maroc: Programme National de lutte contre les IST/SIDA, 2008.
- 9 Ministry of Health-Morocco, The Joint United Nations Programme on HIV/AIDS (UNAIDS), The Global Fund. HIV integrated behavioral and biological surveillance surveys-Morocco 2011: Female sex workers in Agadir, Fes, Rabat and Tanger. Morocco: 2012.
- 10 Baqi S, Nabi N, Hasan SN, Khan AJ, Pasha O, Kayani N, et al. HIV antibody seroprevalence and associated risk factors in sex workers, drug users, and prisoners in Sindh, Pakistan. *Journal of acquired immune deficiency syndromes and human retrovirology : official publication of the International Retrovirology Association*. 1998;18:73-9.
- 11 Rehan N, Bokhari A, Nizamani NM, Jackson D, Naqvi HR, Qayyum K, et al. National study of reproductive tract infections among high risk groups of Lahore and Karachi. *Journal of the College of Physicians and Surgeons Pakistan*. 2009;19:228-31.
- 12 Ministry of Health-Pakistan National AIDS Control Program. National study of reproductive tract and sexually transmitted infections: A survey of high risk groups in Lahore and Karachi, Pakistan. 2005.
- 13 Shah A.S., Memon M.A., Soomro S., Kazi N., Kristensen S., editors. Seroprevalence of HIV, syphilis, hepatitis B and hepatitis C among female commercial sex workers in Hyderabad, Pakistan. *International AIDS Conference*, C12368; 2004.
- 14 Hawkes S, Collumbien M, Platt L, Lalji N, Rizvi N, Andreasen A, et al. HIV and other sexually transmitted infections among men, transgenders and women selling sex in two cities in Pakistan: A cross-sectional prevalence survey. *Sexually Transmitted Infections*. 2009;85:ii8-ii16.
- 15 Khan MS, Unemo M, Zaman S, Lundborg CS. HIV, STI prevalence and risk behaviours among women selling sex in Lahore, Pakistan. *BMC Infectious Diseases*. 2011;11 (no pagination).
- 16 Jama H, Hederstedt B, Osman S, Omar K, Isse A, Bygdeman S. Syphilis in women of reproductive age in Mogadishu, Somalia: Serological survey. *Genitourinary Medicine*. 1987;63:326-8.

- 17 Jama Ahmed H, Omar K, Adan SY, Guled AM, Grillner L, Bygdeman S. Syphilis and human immunodeficiency virus seroconversion during a 6-month follow-up of female prostitutes in Mogadishu, Somalia. *International Journal of STD and AIDS*. 1991;2:119-23.
- 18 Scott DA, Corwin AL, Constantine NT, Omar MA, Guled A, Yusef M, et al. Low prevalence of human immunodeficiency virus-1 (HIV-1), HIV-2, and human T cell lymphotropic virus-1 infection in Somalia. *American Journal of Tropical Medicine and Hygiene*. 1991;45:653-9.
- 19 Corwin AL, Olson JG, Omar MA, Razaki A, Watts DM. HIV-1 in Somalia: Prevalence and knowledge among prostitutes. *Aids*. 1991;5:902-4.
- 20 Watts DM, Corwin AL, Omar MA, Hyams KC. Low risk of sexual transmission of hepatitis C virus in Somalia. *Transactions of the Royal Society of Tropical Medicine and Hygiene*. 1994;88:55-6.
- 21 International Organization for Migration (IOM). Integrated biological and behavioural surveillance survey among vulnerable women in Hargeisa, Somaliland. Geneva, Switzerland: 2017.
- 22 Government of the Republic of South Sudan-Ministry of Health. A bio-behavioral HIV survey of female sex workers in South Sudan. South Sudan: 2016.
- 23 Bchir A, Jemni L, Saadi M, Milovanovic A, Brahim H, Catalan F. Markers of sexually transmitted diseases in prostitutes in central Tunisia. *Genitourinary medicine*. 1988;64:396-7.
- 24 Ayachi F, Kechrid A, Lagha N, Ben Hamida A, Amamou H, Ben Mahmoud R. Seroprevalence rate of syphilis in 3 groups of sexually active tunisian women. [French]. *Medecine et Maladies Infectieuses*. 1997;27:913-4.
- 25 Stulhofer A, Bozicevic I. HIV bio-behavioural survey among female sex workers in Aden, Yemen. 2008.
- 26 National AIDS Control Program, Johns Hopkins University Bloomberg School of Public Health HIV Surveillance Project. Integrated behavioral & biological surveillance (IBBS) in Afghanistan: Year 1 report. Kabul, Afghanistan: 2010.
- 27 National AIDS Control Program, Johns Hopkins University Bloomberg School of Public Health HIV Surveillance Project. Integrated biological & behavioral surveillance (IBBS) in selected cities of Afghanistan: Findings of 2012 IBBS survey and comparison to 2009 IBBS survey. Kabul, Afghanistan: 2012.
- 28 Ministere de la Sante et de la Population et de la Reforme Hospitaliere, Direction de la Prevention Comite National de Lutte contre les IST/VIH/SIDA. Plan national strategique de lutte contre les IST/VIH/Sida 2008-2012. Geneva, Switzerland: 2009.
- 29 Mirzazadeh A, M. Shokoohi, R. Khajehkazemi, et al., editor HIV and sexually transmitted infections among female sex workers in Iran: Findings from the 2010 and 2015 national surveillance surveys. 21st International AIDS Conference, Durban, South Africa, 7/18-22, ePoster, Abstract TUPEC175; 2016.
- 30 Bibi I, Devrajani BR, Shah SZA, Soomro MH, Jatoi MA. Frequency of syphilis in female sex workers at red light area of Hyderabad, Pakistan. *Journal of the Pakistan Medical Association*. 2010;60:353-6.
- 31 Raza M, Ikram N, Saeed N, Waheed U, Kamran M, Iqbal R, et al. HIV/AIDS and syphilis screening among high risk groups. *J Rawal Med Coll*. 2015;19:11-4.
- 32 Burans JP, Fox E, Omar MA, Farah AH, Abbass S, Yusef S, et al. HIV infection surveillance in Mogadishu, Somalia. *East African medical journal*. 1990;67:466-72.
- 33 Sudan National AIDS Control Program. Integrated bio-behavioral HIV surveillance (IBBS) among female sex workers and men who have sex with men in 15 states of Sudan, 2011-2012. 2012.
- 34 Znazen A, Frikha-Gargouri O, Berrajah L, Bellalouna S, Hakim H, Gueddana N, et al. Sexually transmitted infections among female sex workers in Tunisia: High prevalence of *Chlamydia trachomatis*. *Sexually Transmitted Infections*. 2010;86:500-5.

- 35 World Health Organization. Global health observatory data repository. 2018. Available: <http://apps.who.int/gho/data/node.main.A1360STI?lang=en>. Accessed.
- 36 Additional country-level data provided through the MENA HIV/AIDS Epidemiology Synthesis Project database by the World Health Organization Regional Office for the Eastern Mediterranean. 2013.
- 37 World Health Organization. Report on globally sexually transmitted infection surveillance 2015. Geneva, Switzerland: World Health Organization, 2016 Contract No.: ISBN 978 92 4 156530 1
- 38 Moayedi-Nia S, Bayat Jozani Z, Esmaeeli Djavid G, Entekhabi F, Bayanolhagh S, Saatian M, et al. HIV, HCV, HBV, HSV, and syphilis prevalence among female sex workers in Tehran, Iran, by using respondent-driven sampling. *AIDS Care*. 2016;28:487-90.
- 39 Khattabi H., Alami K. Surveillance sentinelle du VIH: Resultats 2004 et tendances de la seroprevalence du VIH. Morocco: 2005.
- 40 Bennani A., Alami K. Surveillance sentinelle du VIH: Resultats 2005 et tendances de la seroprevalence du VIH. 2006.
- 41 Abu-Raddad L, Akala FA, Semini I, Riedner G, Wilson D, Tawil O. Characterizing the HIV/AIDS epidemic in the Middle East and North Africa: Time for strategic action. World Bank/UNAIDS/WHO Publication, editor. Washington DC: The World Bank Press; 2010.
- 42 Kadi Z, Bouguerrou A, Ait-Mokhtar N, Allouache A, Ziat A, Orfilla J. Genital chlamydia infections. A seroepidemiologic study in Algiers. [French]. *Archives de l'Institut Pasteur d'Algerie Institut Pasteur d'Algerie*. 1989;57:73-82.
- 43 Darougar S, Aramesh B, Gibson JA, Treharne JD, Jones BR. Chlamydial genital infection in prostitutes in Iran. *British Journal of Venereal Diseases*. 1983;59:53-5.
- 44 World Health Organization. HIV surveillance systems: Regional update 2011. 2011.
- 45 Nasirian M, Kianersi S, Hoseini SG, Kassaian N, Yaran M, Shoaei P, et al. Prevalence of sexually transmitted infections and their risk factors among female sex workers in Isfahan, Iran: A cross-sectional study. *Journal of the International Association of Providers of AIDS Care*. 2017;16:608-14.
- 46 Taghizadeh H, Taghizadeh F, Fathi M, Reihani P, Shirdel N, Rezaee SM. Drug use and high-risk sexual behaviors of women at a drop-in center in mazandaran province, Iran, 2014. *Iranian Journal of Psychiatry and Behavioral Sciences*. 2015;9:49-55.
- 47 Programme de Lutte contre les IST/SIDA. Analyse de la situation et de la reponse au VIH/SIDA en Tunisie. Tunisia: 2005.
- 48 Vafaei H., Asadi N., Foroughinia L., Salehi A., Kuhnnavard S., Akbarzadeh M., et al. Comparison of abnormal cervical cytology from HIV positive women, female sex workers, and general population. *IJCBNM*. 2015;3:76-83.
- 49 Ibrahim AI, Kouwatli KM, Obeid MT. Frequency of herpes simplex virus in Syria based on type-specific serological assay. *Saudi medical journal*. 2000;21:355-60.
